# Supplementary material
Source: Springer Nature journal article supplement (https://www.springermedizin.de/resource/supplementary/12903_2013_340_MOESM2_ESM.pdf/9516864)

A. Tongue cleaning (+)

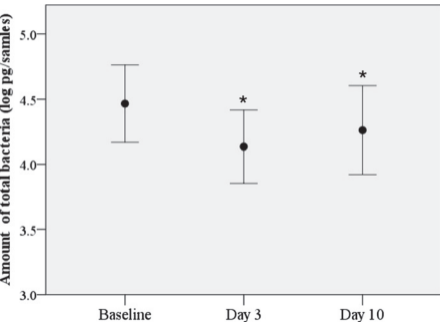

B. Tongue cleaning (-)

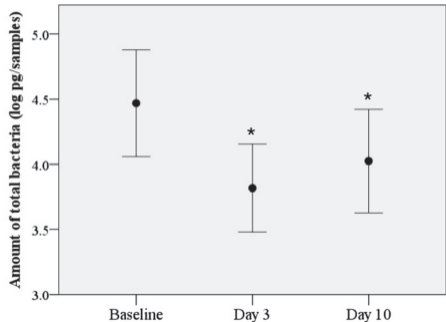

Supplement: MOESM2 [file 9516864]
